# Supplementary material
Source: ML conference proceedings conference paper supplement (https://openaccess.thecvf.com/content/CVPR2022/html/Christen_D-Grasp_Physically_Plausible_CVPR_2022_paper.html)
Supplement: Supplementary file 2 [file Christen_D-Grasp_Physically_Plausible_CVPR_2022_supplemental.zip]

Archive with 2 entries (2 files):
- dgrasp_supplementary.pdf
- dgrasp_video.mp4
